# Supplementary material
Source: publisher figshare collection journal article supplement (https://acs.figshare.com/ndownloader/files/3877522)
Supplement: Supplementary file 1 [file 3877522]

## Supporting Information

### Computational Approaches Elucidate the Allosteric Mechanism of Human Aromatase Inhibition: A Novel Possible Route to Small-Molecule Regulation of CYP450s Activities?

Jacopo Sgrignani<sup>1,⊥</sup>, Marta Bon<sup>2,⊥</sup>, Giorgio Colombo<sup>1\*</sup>, Alessandra Magistrato<sup>2\*</sup>

1. Istituto di Chimica del Riconoscimento Molecolare, CNR , Via Mario Bianco 9, 20131 Milano, Italy.
2. CNR-IOM-Democritos National Simulation Center c/o SISSA, via Bonomea 265, 34165 Trieste, Italy.

⊥ J.S and M.B. equally contributed to this work.

Corresponding Authors:

Alessandra Magistrato  
CNR-IOM- Democritos National Simulation Center  
Via Bonomea 265  
34165 Trieste, Italy.  
Email: [alessandra.magistrato@sissa.it](mailto:alessandra.magistrato@sissa.it)

Giorgio Colombo  
Istituto di Chimica del Riconoscimento Molecolare, CNR .  
Via Mario Bianco 9,  
20131 Milano, Italy.  
Email: [g.colombo@icrm.cnr.it](mailto:g.colombo@icrm.cnr.it)

### **Details about SiteMap Analysis**

After SiteMap analysis eight parameters are reported for every site: (1) SiteScore, (2) size, (3) exposure score, (4) enclosure score, (5) contact, (6) hydrophobic/hydrophilic character, and (7) donor/acceptor character and (8) drug score (Dscore).

In 2009 Halgren reported<sup>1</sup> about an extensive analysis of the SiteMap performances in predicting ligand binding site in protein considering a set of 538 complexes which structure was experimentally solved.

This evaluation has permitted to better relate the SiteMap scores with the properties of the predicted binding site. In particular a SiteScore near 1 is usually assigned to sites able to bind their molecular counterpart with an affinity in the micro-molar range, while a Dscore  $> 1$  could indicate the propensity of a binding site to be targeted with drug like molecules. This analysis also highlighted that an exposure score below 0.52, an enclosure score higher than 0.76 and contact (hydrophobic/hydrophilic) scores near 1 are ideal for identifying promising binding site candidates.

**Table S1.** Score assigned to the five site identified by the SiteMap analysis.

| <b>Title</b>     | <b>Site_1</b> | <b>Site_2</b> | <b>Site_3</b> | <b>Site_4</b> | <b>Site_5</b> |
|------------------|---------------|---------------|---------------|---------------|---------------|
| <b>SiteScore</b> | 1.00          | 0.98          | 0.94          | 0.86          | 0.77          |
| <b>Size</b>      | 128           | 119           | 81            | 73            | 41            |
| <b>Dscore</b>    | 0.95          | 1.02          | 0.96          | 0.77          | 0.47          |
| <b>Volume</b>    | 255           | 284           | 144           | 167           | 66            |
| <b>Exposure</b>  | 0.56          | 0.65          | 0.48          | 0.64          | 0.43          |
| <b>Enclosure</b> | 0.70          | 0.62          | 0.69          | 0.65          | 0.75          |
| <b>Contact</b>   | 0.92          | 0.79          | 1.02          | 0.82          | 1.14          |
| <b>Phobic</b>    | 0.17          | 0.61          | 1.34          | 0.26          | 0.00          |
| <b>Philic</b>    | 1.26          | 0.88          | 0.92          | 1.28          | 1.79          |
| <b>Balance</b>   | 0.14          | 0.69          | 1.43          | 0.20          | 0.00          |
| <b>Don/acc</b>   | 0.67          | 0.54          | 0.79          | 0.44          | 1.28          |

**Table S2.** Residues forming the three putative sites considered in the work.

| Residues forming the site |                                                                                                                                                                  |
|---------------------------|------------------------------------------------------------------------------------------------------------------------------------------------------------------|
| Site_1                    | Arg192; Val 214; Val 215; Ile 217; Gln 218; Gly 219; Phe 221; Asp 222; Pro 308; Ash 309; Ser 312; Val 313; Ile 474; His 480; Pro 481; Asp 482; Glu 483; Thr 484  |
| Site_2                    | Ile 350; Glu 351; Lys 354; Glu 357; Tyr 361; Asn 421; Val 422; Tyr 424; Phe 427; Gln 428; Pro 429; Phe 430; Gly 431; Phe 432; Lys 440; Tyr 441; Met 444; Lys 448 |
| Site_3                    | Lys 150; Ala 151; Ser 153; Pro 155; Gly 156; Arg 159; Leu 202; Phe 203; Glu 273; Glu 274; Met 276; Asp 277; Phe 278; Glu 281                                     |

**Table S3.** Interaction energies ( $\Delta E_{\text{int}}$ ) (kcal/mol) between HA and endoxifen (both the stereoisomers) calculated after 18 ns of productive run. Standard deviations are reported. Interaction energy for Z-endoxifen in site\_2 was not reported because this complex dissociated after 8ns.

|        | $\Delta E_{\text{int}}$<br>HA/E-endoxifen | $\Delta E_{\text{int}}$<br>HA/Z-endoxifen |
|--------|-------------------------------------------|-------------------------------------------|
| Site_1 | -55 (7)                                   | -69 (5)                                   |
| Site_2 | -24 (5)                                   |                                           |
| Site_3 | -67 (14)                                  | -69 (12)                                  |

**Table S4.** Interaction energies ( $\Delta E_{\text{int}}$ ) (kcal/mol) between the drugs and HA calculated over the production run of 100 ns. Standard deviations are reported in parenthesis. Interaction energies of Z-NDT inside site\_1 and Z-tamoxifen in site\_3 are not reported because these inhibitors dissociated from HA after few ns. a

|               | Coulomb<br>(kcal/mol) | Lennard-Jones<br>(kcal/mol) | $\Delta E_{\text{int}}$<br>(kcal/mol) |
|---------------|-----------------------|-----------------------------|---------------------------------------|
| <b>Site_1</b> |                       |                             |                                       |
| E-endoxifen   | -31 (5)               | -26 (2)                     | -57 (5)                               |
| Z-endoxifen   | -29 (12)              | -31 (5)                     | -60 (14)                              |
| E-NDT         | -22 (5)               | - 33 (2)                    | -55 (5)                               |
| E-tamoxifen   | -19 (5)               | -33 (5)                     | -52 (5)                               |
| Z-tamoxifen   | -26 (2)               | -38 (5)                     | -64 (5)                               |
| <b>Site_3</b> |                       |                             |                                       |
| E-endoxifen   | -26 (12)              | -33 (2)                     | -59 (12)                              |
| Z-endoxifen   | -33 (12)              | -33 (5)                     | -66 (12)                              |
| E-NDT         | -2 (2)                | -43 (2)                     | -45 (5)                               |
| Z-NDT         | -7 (10)               | -24 (5)                     | -31 (12)                              |
| E-tamoxifen   | -5 (2)                | -43 (2)                     | -48 (5)                               |

**Table S5.** H-bonds between tamoxifen metabolites and HA over MD trajectories. Only H-bond with persistency larger than 10% are reported. For E-NDT, Z-NDT and E-tamoxifen in site\_3 no H-bonds were detected.

|                           |                   |                 |                  |                 |               |
|---------------------------|-------------------|-----------------|------------------|-----------------|---------------|
| <b>E-endoxifen site 1</b> |                   |                 |                  |                 |               |
| <i>Donor</i>              | <i>Acceptor H</i> | <i>Acceptor</i> | <i>%occupied</i> | <i>distance</i> | <i>angle</i>  |
| Glu483@ Oε1               | EndoE@ H18        | EndoE@ N1       | 75,15            | 2,887 (0,18)    | 34,29 (15,77) |
| Glu483@ O□2               | EndoE@ H18        | EndoE@ N1       | 66,08            | 2,894 (0,19)    | 30,04 (14,26) |
| Gln218@ Oε1               | EndoE@ H17        | EndoE@ N1       | 12,14            | 2,843 (0,14)    | 27,86 (13,43) |
| <b>Z-endoxifen site 1</b> |                   |                 |                  |                 |               |
| <i>Donor</i>              | <i>Acceptor H</i> | <i>Acceptor</i> | <i>%occupied</i> | <i>distance</i> | <i>angle</i>  |
| His480@Nδ                 | EndoZ@ H18        | EndoE@ N1       | 23,55            | 3,030 (0,15)    | 36,3 (13,29)  |
| Lys243@ O                 | EndoZ@ H13        | EndoE@ O1       | 22,03            | 2,747 (0,14)    | 23,46 (11,65) |
| Asp482@ Oδ1               | EndoZ@ H13        | EndoE@ O1       | 21,03            | 2,695 (0,21)    | 20,06 (13,16) |
| Asp482@ Oδ2               | EndoZ@ H13        | EndoE@ O1       | 20,41            | 2,702 (0,23)    | 20,27 (13,35) |
| <b>E-NDT site 1</b>       |                   |                 |                  |                 |               |
| <i>Donor</i>              | <i>Acceptor H</i> | <i>Acceptor</i> | <i>%occupied</i> | <i>distance</i> | <i>angle</i>  |
| Ser478@Oγ                 | NdesE@H17         | NdesE@N1        | 41,21            | 2,943 (0,16)    | 26,49 (13,60) |
| Leu479@O                  | NdesE@H17         | NdesE@N1        | 17,15            | 2,851 (0,13)    | 30,39 (13,14) |
| Ser478@Oγ                 | NdesE@H13         | NdesE@N1        | 15,66            | 2,960 (0,17)    | 29,67 (15,05) |
| <b>Z-tamoxifen site 1</b> |                   |                 |                  |                 |               |
| <i>Donor</i>              | <i>Acceptor H</i> | <i>Acceptor</i> | <i>%occupied</i> | <i>distance</i> | <i>angle</i>  |
| His480@Nδ                 | TamE@H16          | TamE@N1         | 13,19            | 3,115 (0,16)    | 24,49 (11,57) |
| <b>E-tamoxifen site 1</b> |                   |                 |                  |                 |               |
| <i>Donor</i>              | <i>Acceptor H</i> | <i>Acceptor</i> | <i>%occupied</i> | <i>distance</i> | <i>angle</i>  |
| Ser478@Oγ                 | TamZ@H16          | TamZ@N1         | 63,25            | 2,934 (0,14)    | 34,01 (11,92) |
| Ser478@O                  | TamZ@H16          | TamZ@N1         | 22,32            | 3,048 (0,19)    | 23,71 (10,31) |
| <b>E-endoxifen site 3</b> |                   |                 |                  |                 |               |
| <i>Donor</i>              | <i>Acceptor H</i> | <i>Acceptor</i> | <i>%occupied</i> | <i>distance</i> | <i>angle</i>  |
| Glu281@ Oε2               | EndoE@ H13        | EndoE@O1        | 68,89            | 2,662 (0,13)    | 15,83 (8,42)  |
| Glu281@ Oε1               | EndoE@ H13        | EndoE@O1        | 25,05            | 2,688 (0,17)    | 16,48 (9,83)  |
| <b>Z-endoxifen site 3</b> |                   |                 |                  |                 |               |
| <i>Donor</i>              | <i>Acceptor H</i> | <i>Acceptor</i> | <i>%occupied</i> | <i>distance</i> | <i>angle</i>  |
| Glu281@Oε1                | EndoZ@H13         | EndoZ@O1        | 50,01            | 2,629 (0,11)    | 14,49 (7,90)  |
| Glu281@Oε2                | EndoZ@H13         | EndoZ@O1        | 49,89            | 2,629 (0,11)    | 14,85 (8,17)  |
| Glu273@O                  | EndoZ@H18         | EndoZ@N1        | 27,38            | 2,796 (0,11)    | 20,71 (11,22) |
| Glu273@O                  | EndoZ@H17         | EndoZ@N1        | 25,80            | 2,822 (0,12)    | 22,89 (11,56) |
| <b>E-NDT site 3</b>       |                   |                 |                  |                 |               |
| No H-bonds detected       |                   |                 |                  |                 |               |
| <b>Z-NDT site 3</b>       |                   |                 |                  |                 |               |
| No H-bonds detected       |                   |                 |                  |                 |               |
| <b>E-tamoxifen site 3</b> |                   |                 |                  |                 |               |
| No H-bonds detected       |                   |                 |                  |                 |               |

**Table S6.** H-bonds between HA and ASD during MD simulations with tamoxifen metabolites bound both in site\_1 and site\_3.

| <b>E-endoxifen site 1</b> |                   |                 |                  |                 |               |
|---------------------------|-------------------|-----------------|------------------|-----------------|---------------|
| <i>Donor</i>              | <i>Acceptor H</i> | <i>Acceptor</i> | <i>%occupied</i> | <i>distance</i> | <i>angle</i>  |
| Asd@O2                    | Met374@H          | Met374@N        | 99,47            | 2,976 (0,15)    | 19,87 (9,65)  |
| Asd@O1                    | Asp309@HD2        | Asp309@Od2      | 6,11             | 2,798 (0,17)    | 26,07 (11,45) |
| <b>Z-endoxifen site 1</b> |                   |                 |                  |                 |               |
| <i>Donor</i>              | <i>Acceptor H</i> | <i>Acceptor</i> | <i>%occupied</i> | <i>distance</i> | <i>angle</i>  |
| Asd@O2                    | Met374@H          | Met374@N        | 98,78            | 2,987 (0,16)    | 21,29 (10,15) |
| Asd@O1                    | Asp309@HD2        | Asp309@Od2      | 10,14            | 2,974 (0,26)    | 40,12 (14,37) |
| <b>E-NDT site 1</b>       |                   |                 |                  |                 |               |
| <i>Donor</i>              | <i>Acceptor H</i> | <i>Acceptor</i> | <i>%occupied</i> | <i>distance</i> | <i>angle</i>  |
| Asd@O2                    | Met374@H          | Met374@N        | 99,76            | 2,923 (0,13)    | 20,14 (9,43)  |
| <b>E-tamoxifen site 1</b> |                   |                 |                  |                 |               |
| <i>Donor</i>              | <i>Acceptor H</i> | <i>Acceptor</i> | <i>%occupied</i> | <i>distance</i> | <i>angle</i>  |
| Asd@O2                    | Met374@H          | Met374@N        | 99,92            | 2,926 (0,13)    | 19,31 (9,37)  |
| <b>E-tamoxifen site 1</b> |                   |                 |                  |                 |               |
| <i>Donor</i>              | <i>Acceptor H</i> | <i>Acceptor</i> | <i>%occupied</i> | <i>distance</i> | <i>angle</i>  |
| Asd@O2                    | Met374@H          | Met374@N        | 99,76            | 2,923 (0,13)    | 20,14 (9,43)  |
| <b>Z-tamoxifen site 1</b> |                   |                 |                  |                 |               |
| <i>Donor</i>              | <i>Acceptor H</i> | <i>Acceptor</i> | <i>%occupied</i> | <i>distance</i> | <i>angle</i>  |
| Asd@O2                    | Met374@H          | Met374@N        | 99,64            | 2,934 (0,13)    | 22,00 (11,62) |
| Asd@O1                    | Thr310@HG1        | Thr310@Og1      | 23,88            | 3,068 (0,24)    | 32,78 (15,79) |
| Asd@O1                    | Asp309@HD2        | Asp309@Og2      | 17,06            | 2,803 (0,17)    | 27,27 (11,41) |
| <b>E-endoxifen site 3</b> |                   |                 |                  |                 |               |
| <i>Donor</i>              | <i>Acceptor H</i> | <i>Acceptor</i> | <i>%occupied</i> | <i>distance</i> | <i>angle</i>  |
| Asd@O2                    | Met374@H          | Met374@N        | 99,84            | 2,945 (0,14)    | 19,32 (9,52)  |
| Asd@O1                    | Asp309@HD2        | Asp309@OD2      | 7,26             | 2,891 (0,22)    | 27,73 (14,21) |
| <b>Z-endoxifen site 3</b> |                   |                 |                  |                 |               |
| <i>Donor</i>              | <i>Acceptor H</i> | <i>Acceptor</i> | <i>%occupied</i> | <i>distance</i> | <i>angle</i>  |
| Asd@O2                    | Met374@H          | Met374@N        | 99,60            | 2,971 (0,14)    | 19,94 (10,07) |
| Asd@O1                    | Asp309@HD2        | Asp309@Od2      | 47,58            | 2,824 (0,18)    | 20,10 (12,67) |
| <b>E-NDT site 3</b>       |                   |                 |                  |                 |               |
| <i>Donor</i>              | <i>Acceptor H</i> | <i>Acceptor</i> | <i>%occupied</i> | <i>distance</i> | <i>angle</i>  |
| Asd@O2                    | Met374@H          | Met374@N        | 98,82            | 3,009 (0,16)    | 20,77 (9,48)  |
| <b>Z-NDT site 3</b>       |                   |                 |                  |                 |               |
| <i>Donor</i>              | <i>Acceptor H</i> | <i>Acceptor</i> | <i>%occupied</i> | <i>distance</i> | <i>angle</i>  |
| Asd@O2                    | Met374@H          | Met374@N        | 99,70            | 2,947 (0,14)    | 20,72 (9,53)  |
| <b>Z-tamoxifen site 3</b> |                   |                 |                  |                 |               |
| <i>Donor</i>              | <i>Acceptor H</i> | <i>Acceptor</i> | <i>%occupied</i> | <i>distance</i> | <i>angle</i>  |
| Asd@O2                    | Met374@H          | Met374@N        | 99,52            | 2,966 (0,14)    | 20,74 (10,16) |
| Asd@O1                    | Asp309@HD2        | Asp309@Od2      | 28,53            | 2,806 (0,17)    | 16,83 (10,84) |
| <b>Free HA</b>            |                   |                 |                  |                 |               |
| <i>Donor</i>              | <i>Acceptor H</i> | <i>Acceptor</i> | <i>%occupied</i> | <i>distance</i> | <i>angle</i>  |
| Asd@O2                    | Met374@H          | Met374@N        | 81,47            | 3,152 (0,17)    | 17,38 (9,59)  |

**Table S7.** Summary of the residues, which targeted by mutagenesis studies, resulted to have an impact on HA function. The biological effect induced by their mutation is also mentioned.

| Residue/residues                                                                                                                                                                                                                |                                                                                                                             |
|---------------------------------------------------------------------------------------------------------------------------------------------------------------------------------------------------------------------------------|-----------------------------------------------------------------------------------------------------------------------------|
| Pro308, Arg115, Ile133, Phe134, Phe221, Trp224, Ala306, Thr310, Val370, Val373, Met374, Leu477                                                                                                                                  | They make van der Waals contacts with androstenedione.                                                                      |
| Arg435, Cys437, Phe430, Gly439                                                                                                                                                                                                  | Interaction with the heme group.                                                                                            |
| Asp309                                                                                                                                                                                                                          | Makes a hydrogen bond with the 3-keto moiety of the bond Asd - O1                                                           |
| Lys99, Lys108, 389/390, Lys420, Arg425                                                                                                                                                                                          | Positively charged amino acids which interact with negatively charged residues on the CPR.                                  |
| Lys108                                                                                                                                                                                                                          | Interacts with Asn175, Thr177 residues of CPR.                                                                              |
| Tyr361                                                                                                                                                                                                                          | Key role in increasing aromatase activity in cancer cells.                                                                  |
| 21-42, 49-71                                                                                                                                                                                                                    | Interactions with the membrane.                                                                                             |
| 67-68, 69,80                                                                                                                                                                                                                    | Embedded in the membrane. They are supposed to play an important role in the access of the substrate                        |
| 229-231 (F-G loop)                                                                                                                                                                                                              | Undergoes an open/close motion that allows the steroids to enter into or leave from the active site through access channel. |
| Arg192, Ile217, Gln218, Phe221, Asp222, Trp224, Ala225, Thr310, Ser312, Val313, Thr320, Val369, Ile474, Ser478, Leu479, His480, Pro481, Ala212, Ile217, Tyr220, Tyr221, Ile225, Val257, Arg264, Asp309, Tyr310, Glu483, Thr484. | Putative channels for the entrance/egress of Asd to/from the catalytic site.                                                |
| Leu190, Leu191, Arg192, Arg193, Met195, Thr198, Met446, Ile450, Glu483                                                                                                                                                          | Putative channels for the entrance/egress of O2 to/from the catalytic site.                                                 |
| Val178, Thr179, Asn180, Arg180, Glu183, Tyr184, Val185, Asp186, Lys440 (D-E loop).                                                                                                                                              | Important role in the self-association of aromatase monomers, which leads to an oligomeric assembly.                        |

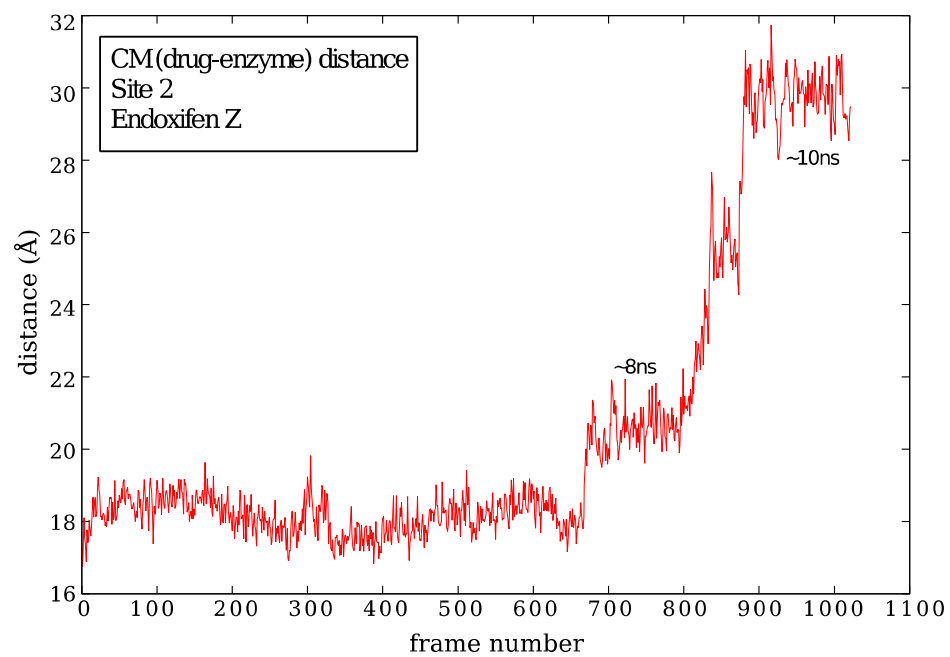

**Figure S1.** Site 2: Distance (Å) between the center of masses of the Z-endoxifen and of HA vs simulation time.

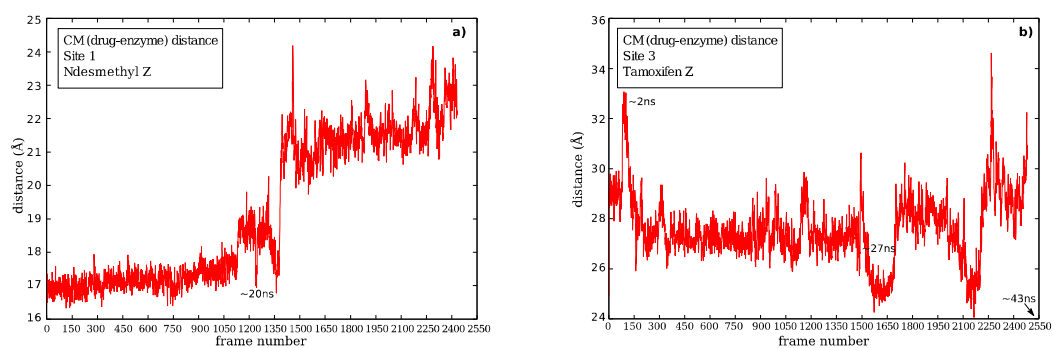

**Figure S2.** a) Site 1: Distance (Å) between the center of masses of the Z-N-desmethyl-tamoxifen and of HA. b) Site 3: Distance (Å) between the center of masses of the Z-tamoxifen and of HA.

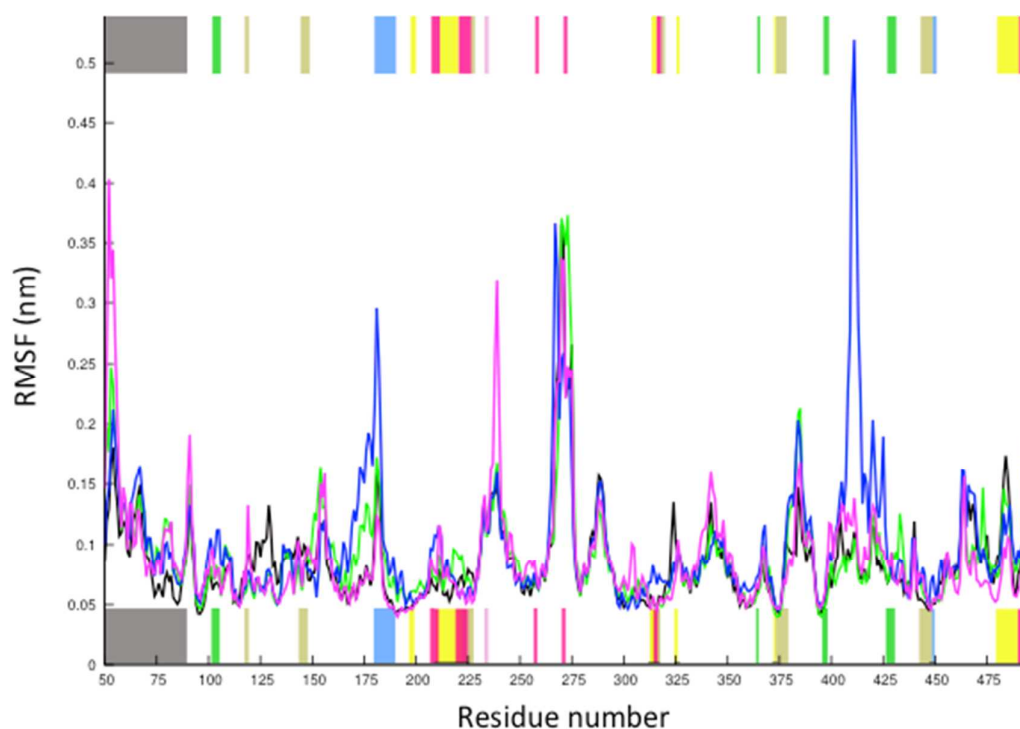

**Figure S3.** RMSF per residue for HA in complex with with E-NDT (green) and E-tamoxifen (blue), Z-tamoxifen (Purple) bound in site\_1 and for the aromatase without inhibitors (black). With the different colors at the top and at the bottom of the picture we indicate the zones to which key-residues (listed in Table S5) belong: i) tan for the active site residues; ii) green for the residues, which interact with CPR-reductase; iii) pink for the F-G loop; iv) yellow for the crystallographic channel of access for ASD; v) purple for the channel of access for ASD in presence of the membrane found by some of us<sup>2</sup>; vi) light blue for the D-E loop.

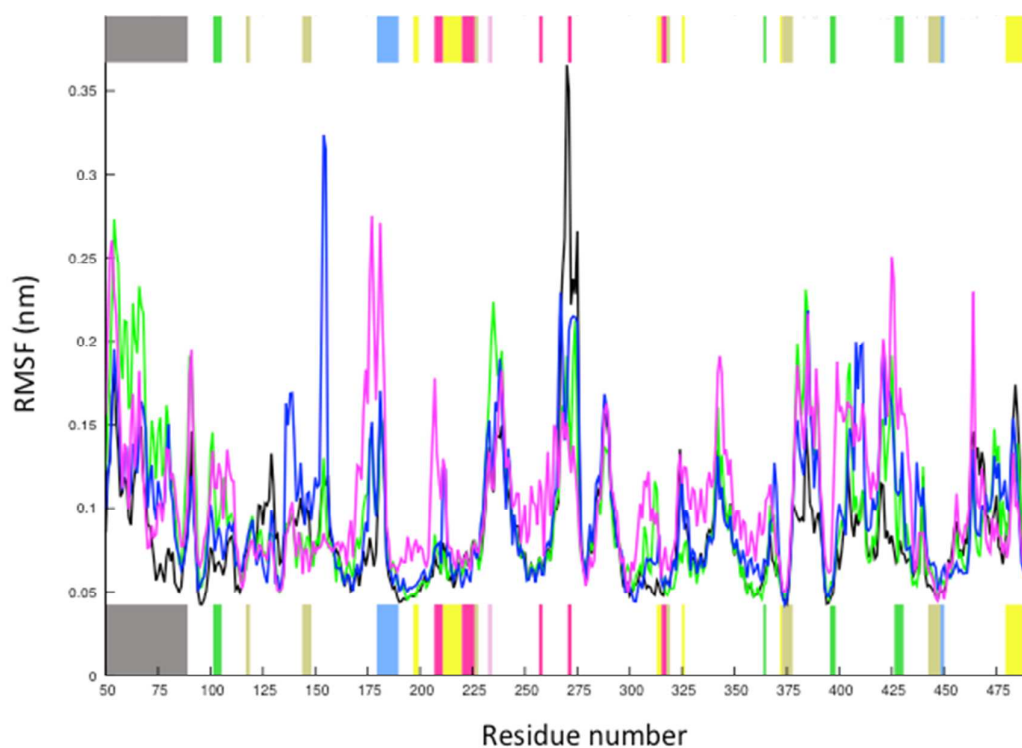

**Figure S4.** RMSF per residue for HA in complex with with E-NDT (green) and Z-NDT (blue), E-tamoxifen (Purple) bound in site\_3 and for the aromatase without inhibitors (black). With the different colors at the top and at the bottom of the picture we indicate the zones to which key-residues (listed in Table S5) belong: i) tan for the active site residues; ii) green for the residues, which interact with CPR-reductase; iii) pink for the F-G loop; iv) yellow for the crystallographic channel of access for ASD; v) purple for the channel of access for ASD in presence of the membrane found by some of us<sup>2</sup>; vi) light blue for the D-E loop.

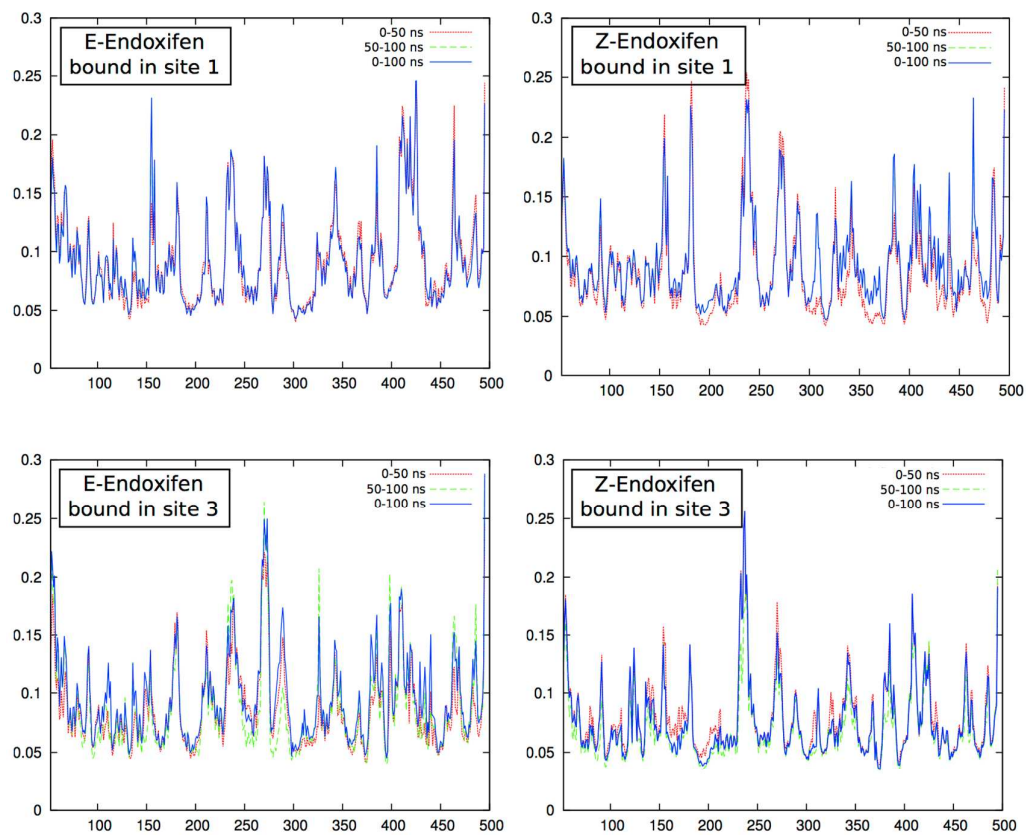

**Figure S5.** RMSF per residue for HA/endoxifen adducts calculated considering different portions of MD trajectory.

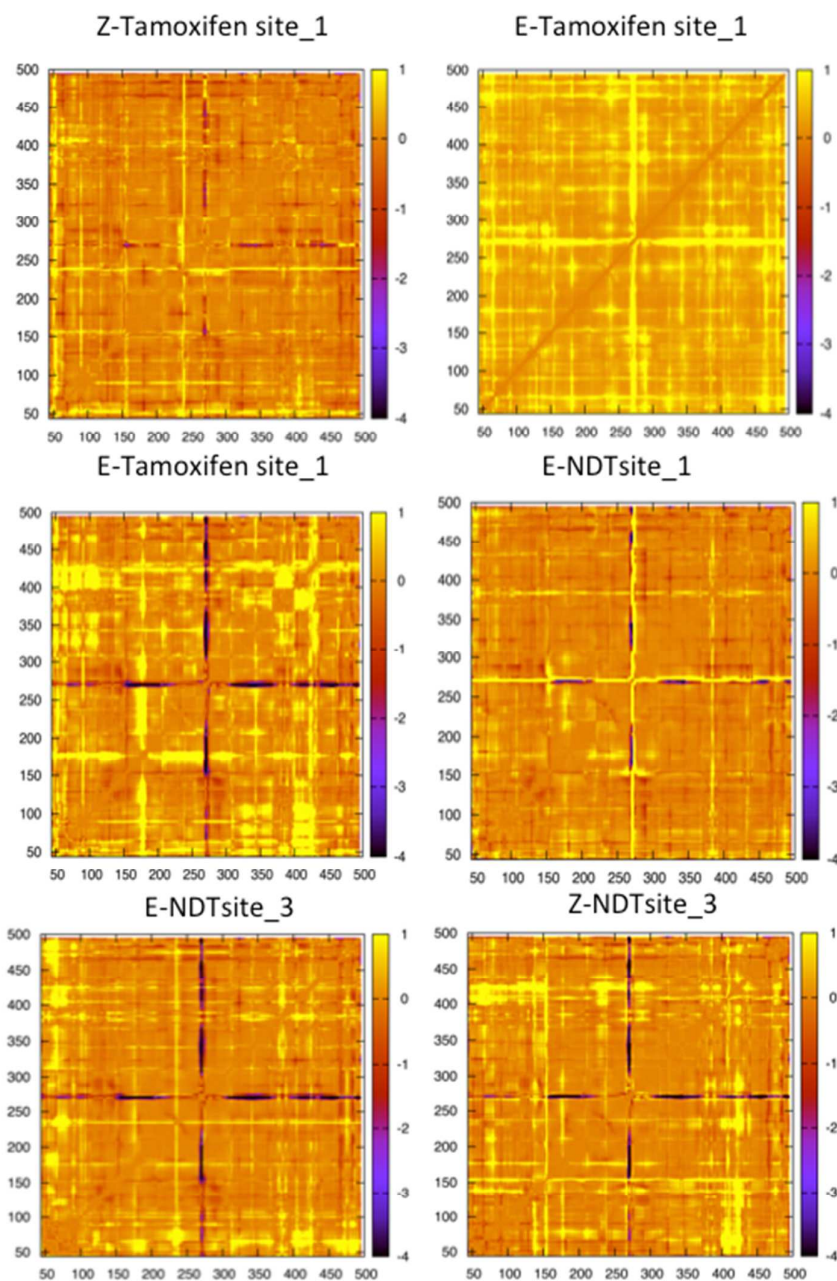

**Figure S6.** Difference between RMS values of residue-residue distance fluctuation matrixes for system not reported in the main text. The difference is calculated subtracting from the RMS value of each drug/HA adduct the RMSF value corresponding to HA without inhibitor. Fluctuation scale is expressed in angstrom.

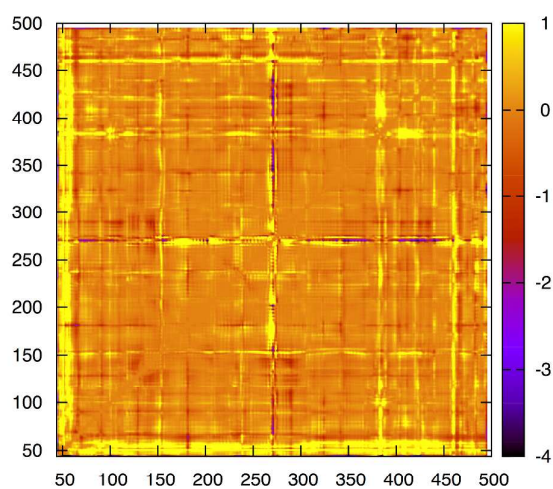

**Figure S7.** Difference between RMS value of residue-residue distance fluctuation matrixes for the HA simulation on the membrane surface. The difference is calculated subtracting from RMS of HA in membrane that of the HA in water. Fluctuation scale is expressed in angstrom.

### First principal component

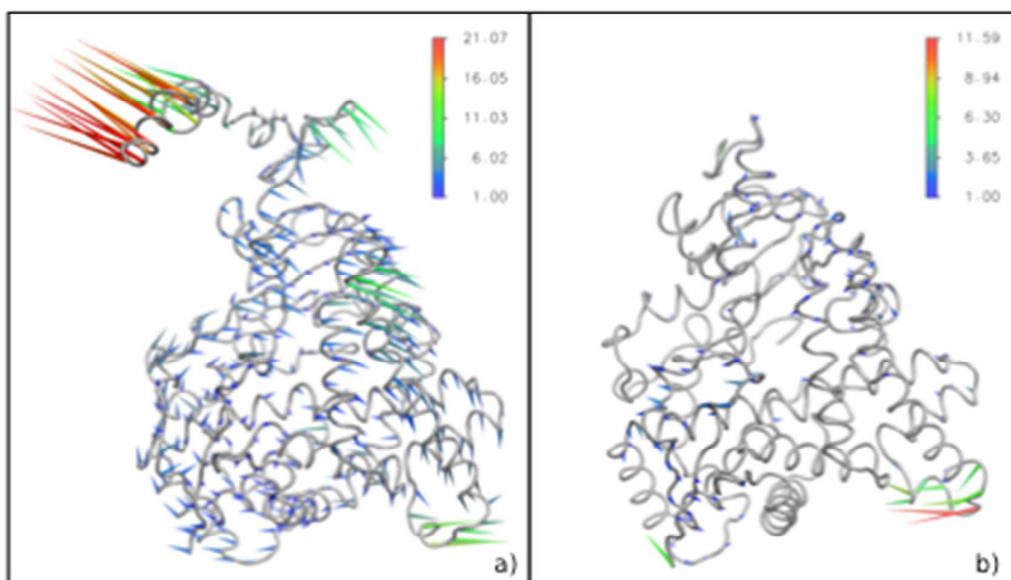

### Second principal component

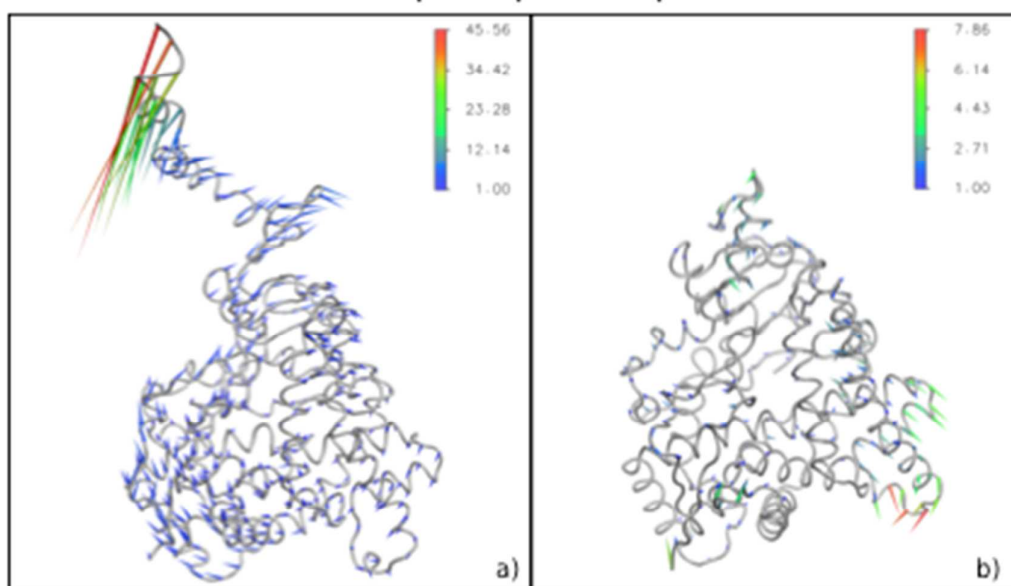

**Figure S8.** Porcupine plots of free aromatase when simulated on the membrane surface (a) or in water (b).

## **Perfomance of force field paramenters in describing the Heme group geometry.**

Ability of the considered force field parameters in correctly reproducing the geometrical properties of the Heme group has been verified by inspection of classical MD trajectories.

In particular the HEMe ring geometry was well reproduced being, similarly to the X-ray structure (pdb code 3EQM), the average Fe-N distances measured during the MD simulations between 2 and 2.10 Å and the average N-Fe-N angle ~89°.

Finally visual comparison of selected MD snaphots and the X-ray strcuture confirmed us the correct description of the HEME ring plane.

## **References**

- (1) Halgren, T. A. Identifying and Characterizing Binding Sites and Assessing Druggability *J. Chem. Inf. Mod.* **2009**, 49, 377-389.
- (2) Sgrignani, J.; Magistrato, A., Influence of the membrane lipophilic environment on the structure and on the substrate access/egress routes of the human aromatase enzyme. A computational study *J. Chem. Inf. Model.* 2012, 52, 1595-1606
